# Supplementary material for: ANGPLT3 Impacts Proteinuria and Hyperlipidemia in Primary Nephrotic Syndrome
Source: Research Square preprint supplement (doi:10.21203/rs.3.rs-1012651/v1), 2021-10-28
Supplement: Supplementary file 1 [file 6c44acd13ccfc47d787ab170.docx]

**Table S1 Oligonucleotides Used in This Study, Related to Experimental Procedures Oligonucleotides used for making template for in vitro transcription**

| **Template** | **Direction** | **Sequence (5’ to 3’)** |
| --- | --- | --- |
| Cas9 | F | TAATACGACTCACTATAGGGAGAATGGACTATAAGGACCACGAC |
| R | GCGAGCTCTAGGAATTCTTAC |
| sgAngptl3 | F | TAATACGACTCACTATAGGTGAAAGGTCTGGATCCACTC |
| R | AAAAGCACCGACTCGGTGCC |

**Table S2** **Oligonucleotides used for genotyping of Angptl3-/- mice**

| **Gene target** | **Direction** | **Sequence (5’ to 3’)** |
| --- | --- | --- |
| Angptl3 | F | CATGCAGCAAATAGCCGTGT |
| R | CAGGAGGCCATTCGCTAAAA |
